# Supplementary material
Source: PubMed Central journal article supplement (PMC5805952)
Supplement: rspb20172631supp1.pdf [file rspb20172631supp1.pdf]

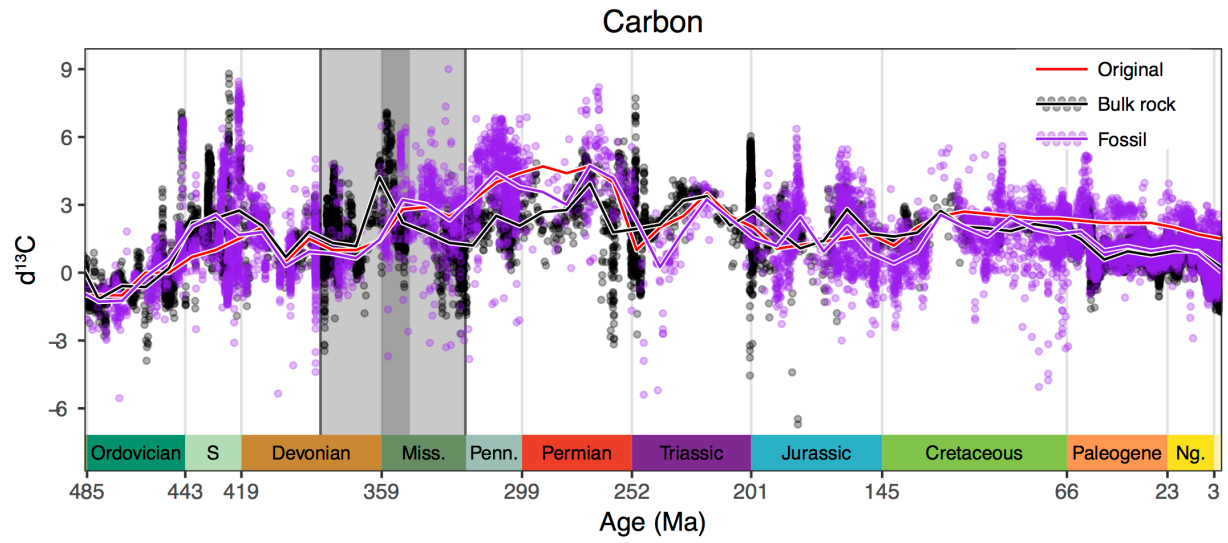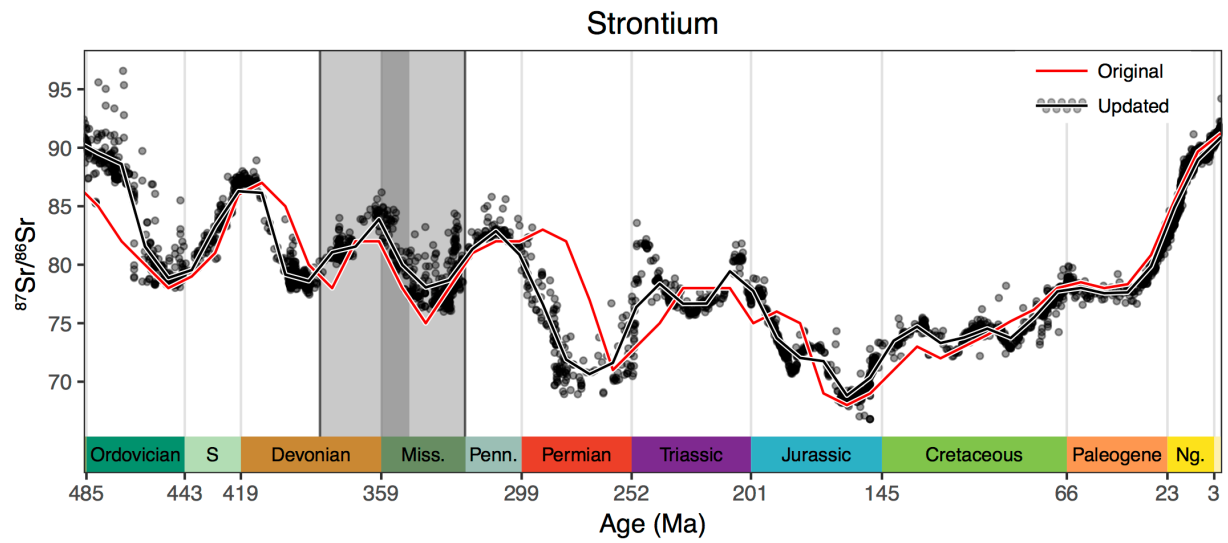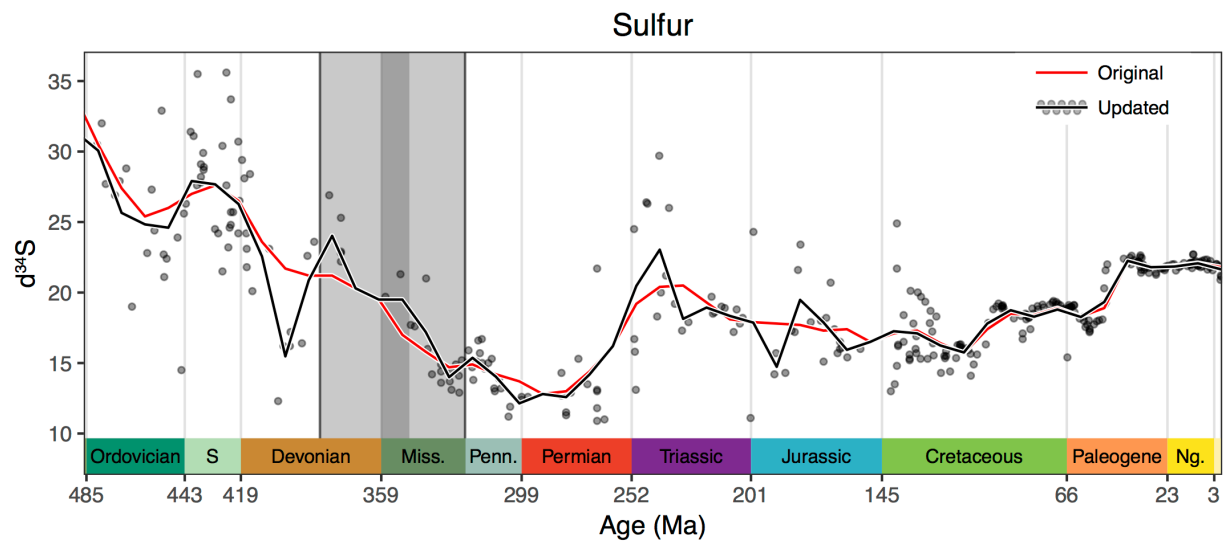

2 **Figure S1.** Isotope values used as input for the GEOCARBSULF model [18]. The shaded box  
3 represents the Hexapod Gap. For the original isotope input, in red, individual data points are not  
4 available. For the updated input, each individual data point is illustrated along with a line  
5 representing the mean value for each 10-million-year bin. Each individual data point is  
6 represented by a translucent circle, so a light point represents one single measurement  
7 corresponding to a particular date and value, whereas a darker point represents multiple  
8 measurements corresponding to the same date and value.

9  
10

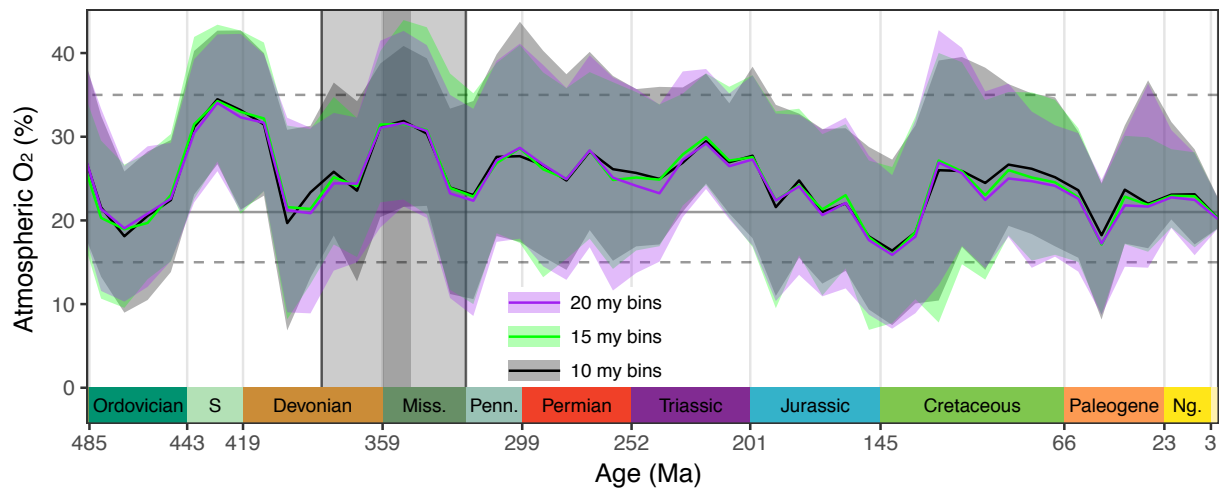

11

12 **Figure S2.** Phanerozoic atmospheric oxygen reconstructed by the GEOCARBSULF model [18]  
13 with different time bins for sulfur. The "all samples" carbon isotope dataset was used here. The  
14 shaded box represents the Hexapod Gap.

15

16

C isotope data from bulk rock samples

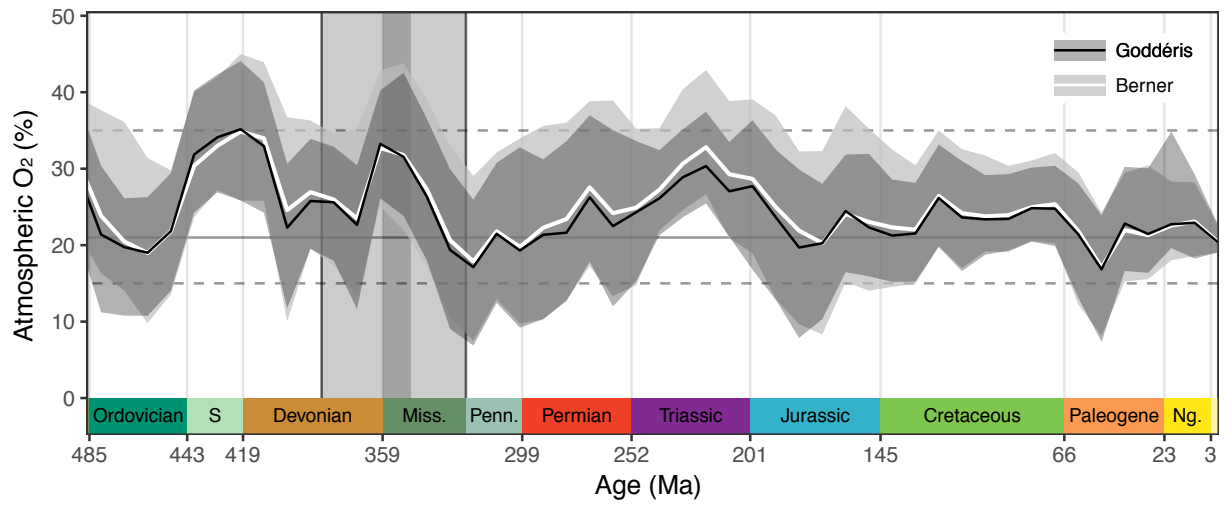

C isotope data from fossil samples

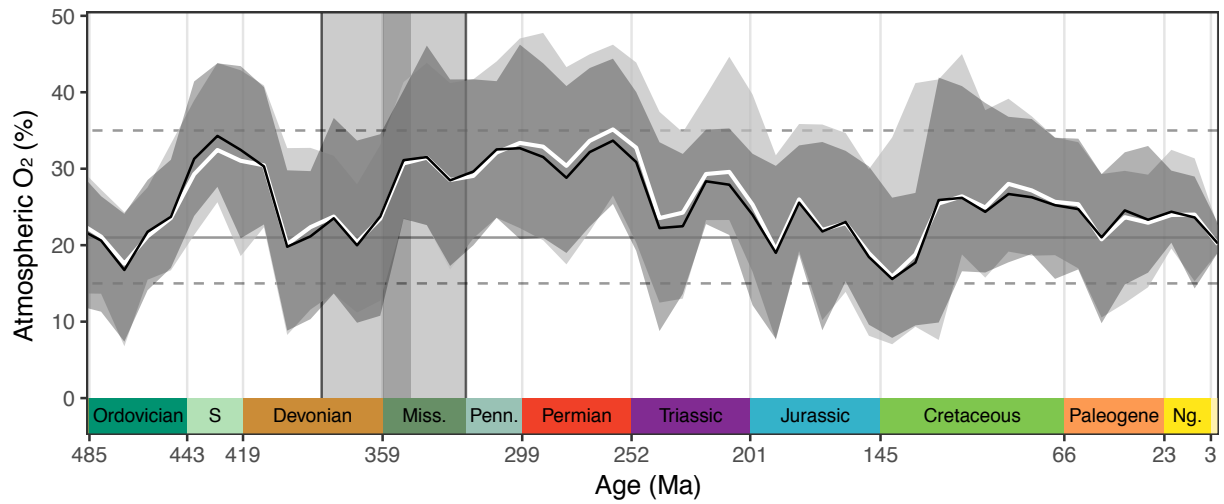

C isotope data from all samples

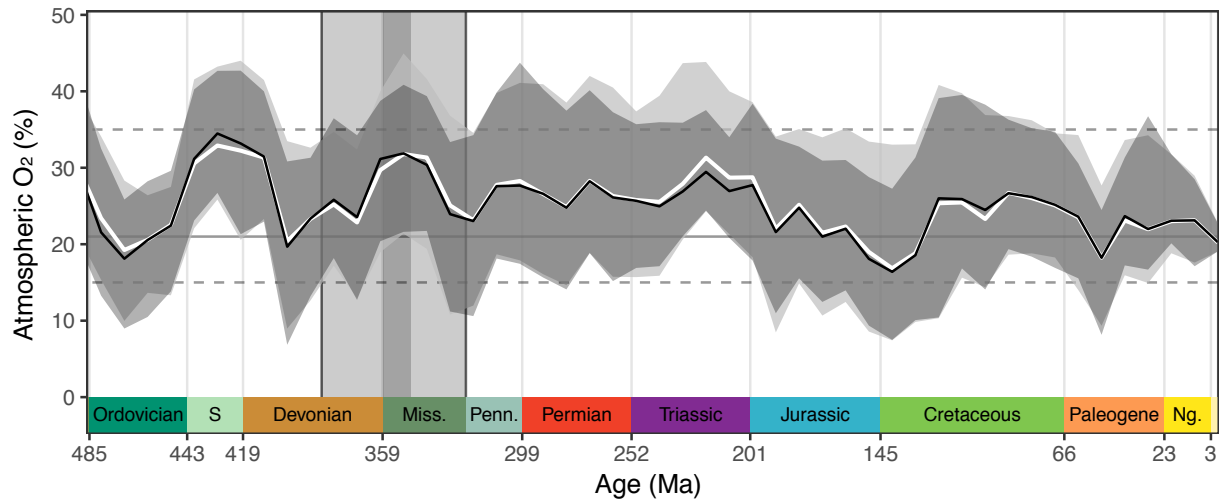

18 **Figure S3.** Phanerozoic atmospheric oxygen reconstructed by the GEOCARBSULF model [18]  
19 with updated isotope input. The shaded box represents the Hexapod Gap.

20  
21  
22

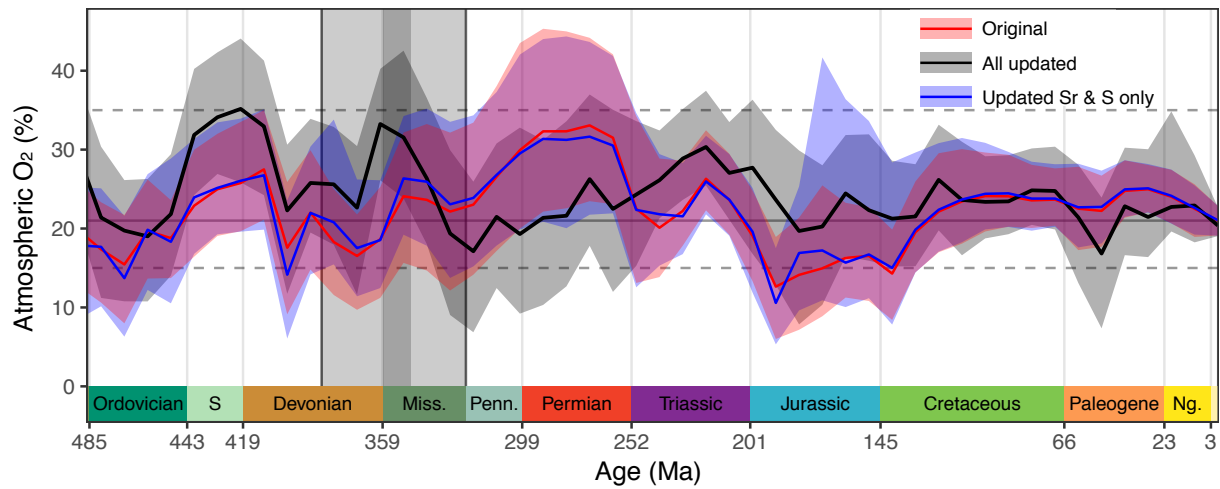

23  
24  
25  
26  
27  
28

**Figure S4.** Phanerozoic atmospheric oxygen reconstructed by the GEOCARBSULF model [18],  
showing model output based on the previous carbon dataset and the new strontium and sulfur  
datasets. The shaded box represents the Hexapod Gap.

C isotope data from bulk rock samples

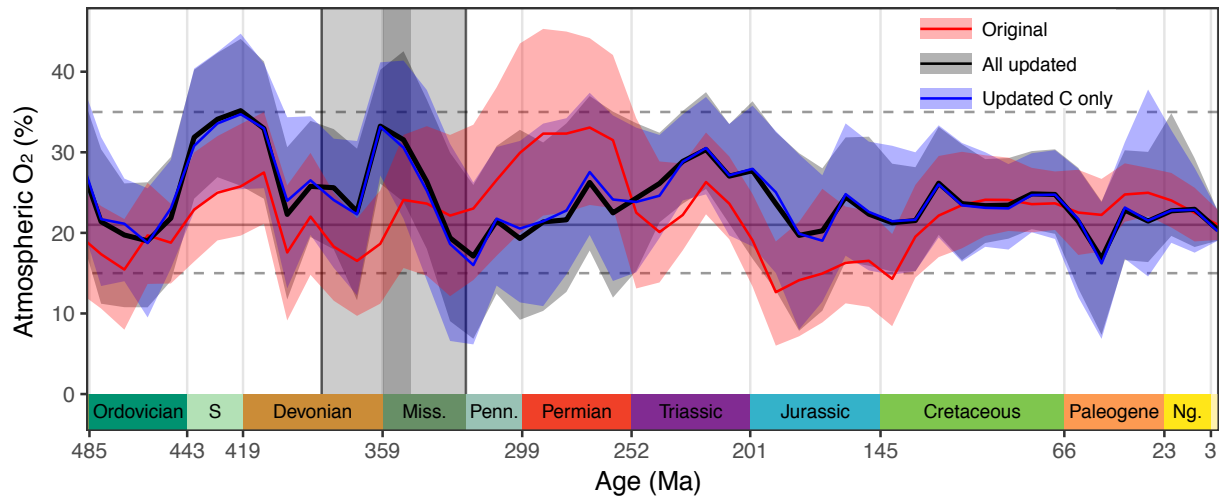

C isotope data from fossil samples

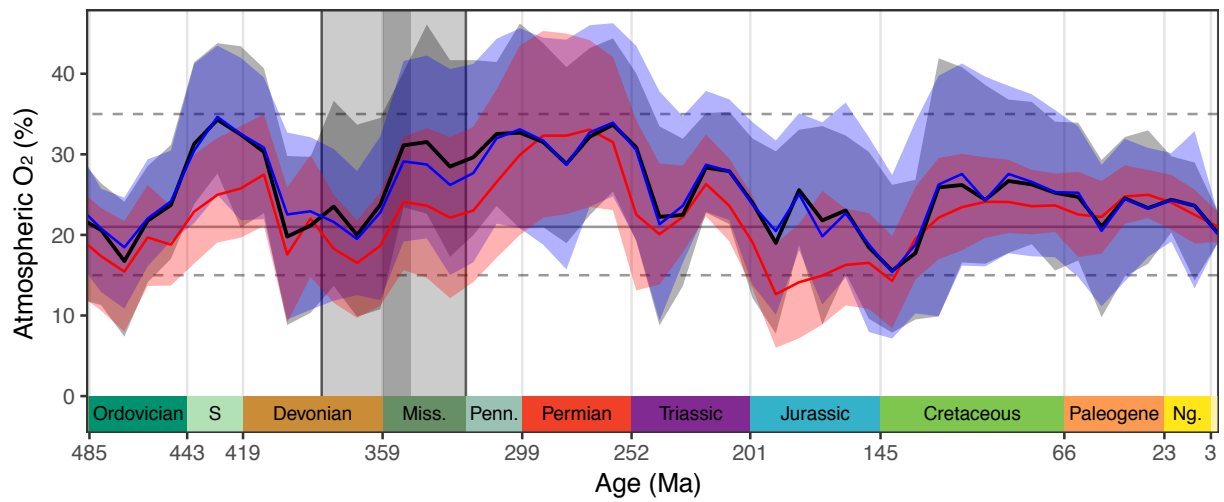

C isotope data from all samples

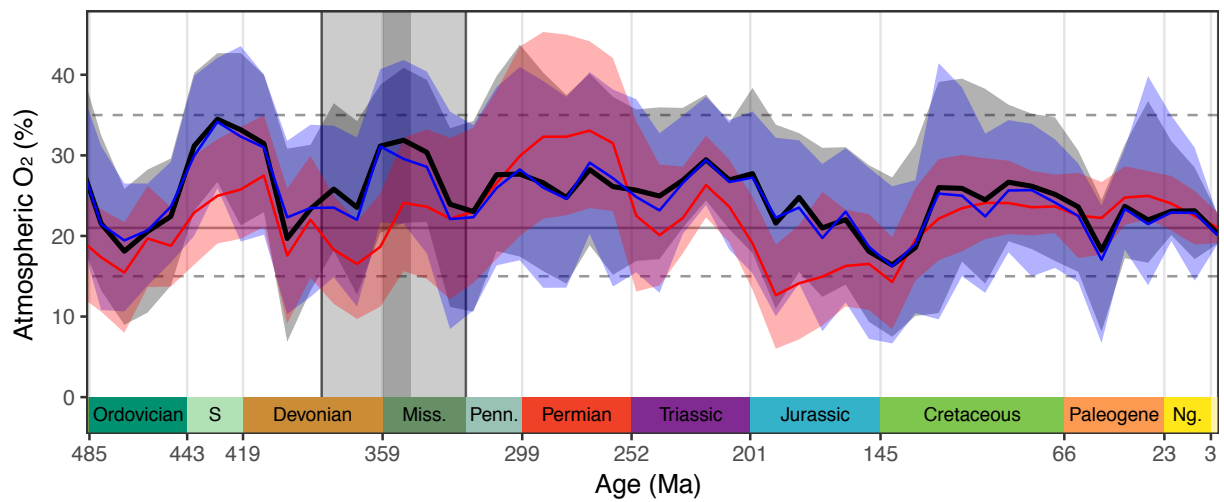

30 **Figure S5.** Phanerozoic atmospheric oxygen reconstructed by the GEOCARBSULF model [18],  
31 showing model output based on the previous strontium and sulfur datasets and the new carbon  
32 datasets. The shaded box represents the Hexapod Gap.

33

34

C isotope data from bulk rock samples

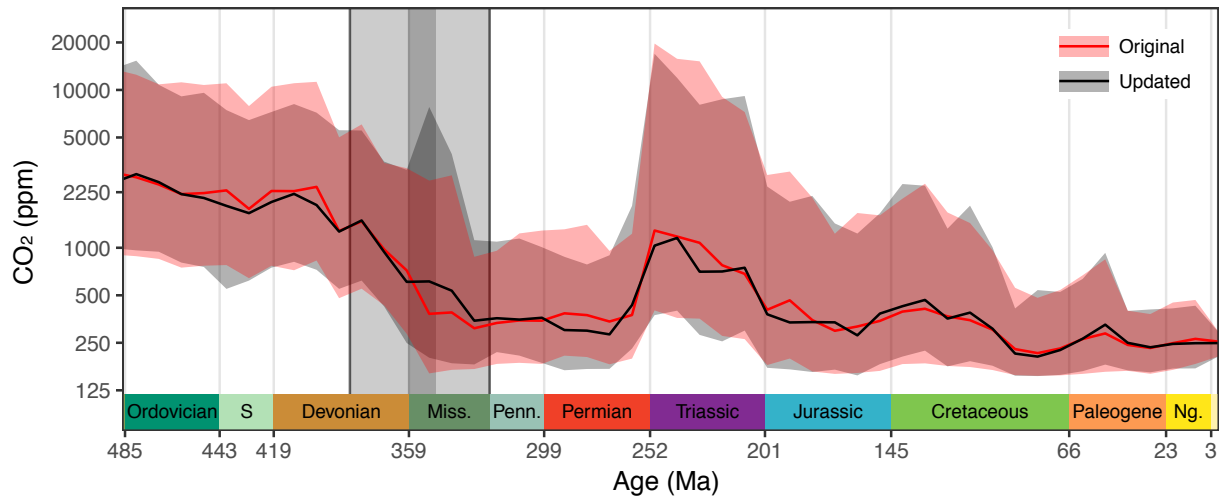

C isotope data from fossil samples

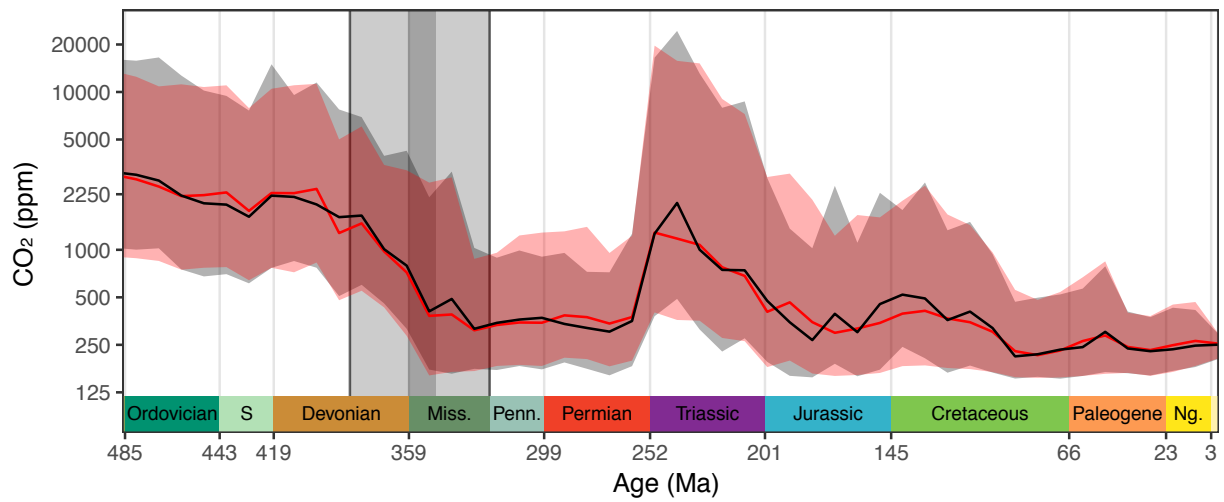

C isotope data from all samples

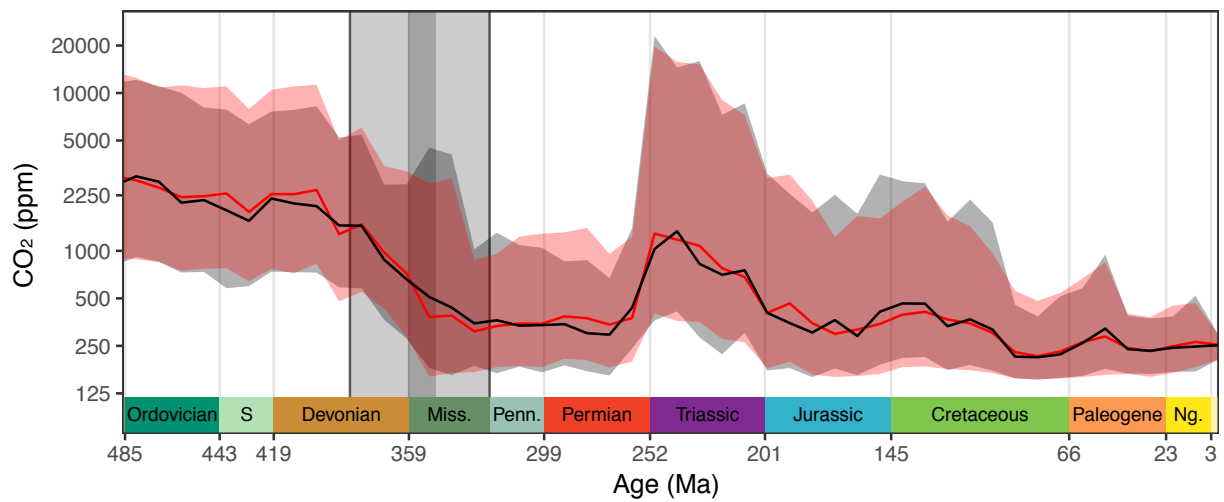

36 **Figure S6.** Phanerozoic carbon dioxide reconstructed by the GEOCARBSULF model [18]. The  
37 black line and dark grey shading represent the mean and 95% confidence interval when the  
38 model is run with updated isotope values. The shaded box represents the Hexapod Gap.

39 **Supplementary data file.** Reconstructions of atmospheric oxygen and carbon dioxide presented  
40 here.
